# Supplementary material for: Clinical and Demographic Determinants of Adherence to Digital Monitoring in Cirrhosis: A Prospective Cohort Analysis
Source: Research Square preprint supplement (doi:10.21203/rs.3.rs-9633932/v1), 2026-05-19
Supplement: Supplementary file 1 [file b804ee96c1fb390cddaffc67.docx]

Supplemental Information: Clinical and Demographic Determinants of Adherence to Digital Monitoring in Cirrhosis: A Prospective Cohort Analysis.

Authors: Buckholz, Thuluvath, Tanner, McSteen, Blocker, Cohen, Verna, Brown

| Demographic Var | OR | 95% conf. interval | | p-value |
| --- | --- | --- | --- | --- |
| Age (continuous) | 0.99 | 0.95 | 1.03 | 0.56 |
| Sex: Female (vs Male) | 0.89 | 0.38 | 2.12 | 0.80 |
| Education: post-secondary (vs up to high school) | 2.01 | 0.72 | 5.60 | 0.18 |
| Race: other (vs non-Hispanic white) | 0.63 | 0.27 | 1.49 | 0.29 |
| Prior use of fitness tracker | 1.79 | 0.75 | 4.30 | 0.19 |

**Supplementary Table 1**. Association of demographic factors with daily adherence using univariable mixed-effects logistic regression.


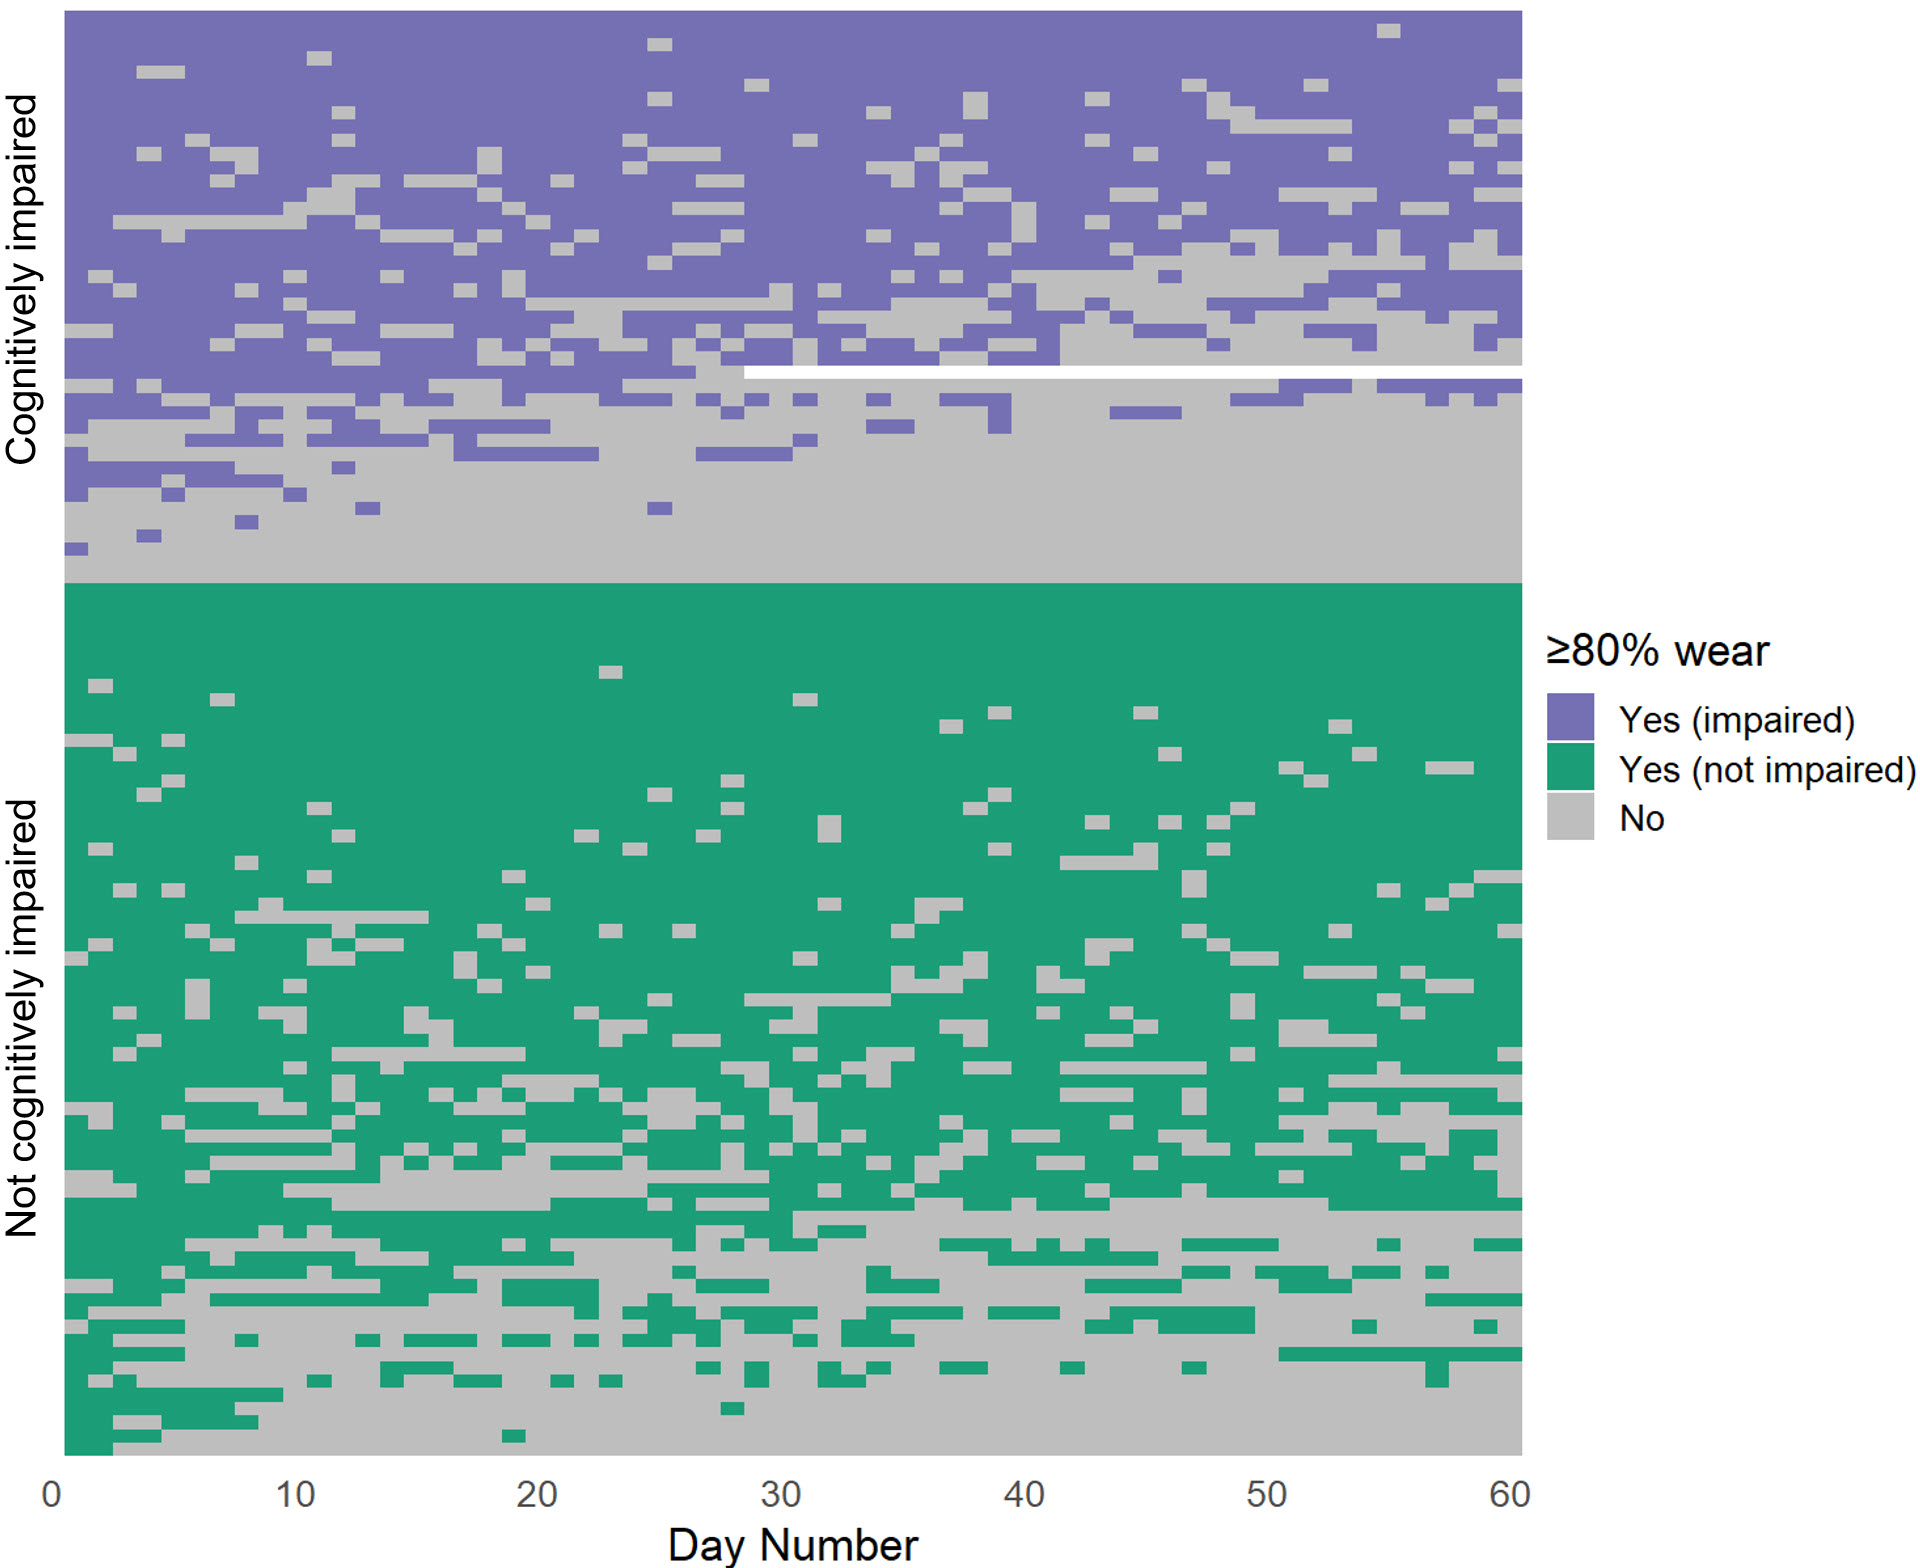


**Supplementary Figure 1**. Heatmap showing daily adherence patterns for cognitively impaired participants (purple / gray) and unimpaired participants (green / gray). An adherent day (purple or green) is one with ≥ 80% wear time. Days with <80% wear time are in gray and white indicates days that were not part of the study either because the participant had withdrawn or because data had not yet been collected. Within the impaired / unimpaired categories, participants were sorted by descending number of adherent days.

| Group | OR | 95% confidence int. | | p-value |
| --- | --- | --- | --- | --- |
| No prior OHE, cognitively normal (n=47) | 1.00 | - | - | - |
| Prior OHE, cognitively normal (n=16) | 0.51 | 0.13 | 1.90 | 0.321 |
| No prior OHE, cognitively abnormal (n=14) | 0.41 | 0.10 | 1.63 | 0.205 |
| Prior OHE, cognitively abnormal (n=28) | 0.17 | 0.06 | 0.47 | 0.001 |

**Table Table 2**. Association of overt hepatic encephalopathy (OHE) and cognition with daily adherence using mixed-effects logistic regression. Participants were grouped into one of four categories based on whether there was prior OHE (Yes/No) and whether cognition was normal or abnormal (PHES ≤ -4). OR: odds ratio; PHES: PHES: Psychometric hepatic encephalopathy score.
